# Supplementary material for: Facile synthesis of continuous Pt island networks and their electrochemical properties for methanol electrooxidation
Source: Royal Society of Chemistry journal article supplement (doi:10.1039/b813935k), 2008-01-01
Supplement: b813935k.pdf [file b813935k.pdf]

**# Supplementary Materials (ESI) for Chemical Communication**

**Supplementary Information-B813935K**

**Facile synthesis of continuous Pt island networks and their  
electrochemical properties for methanol electrooxidation**

Jitendra N. Tiwari, <sup>\*a</sup> Fu-Ming Pan, <sup>\*a</sup> Rajanish N. Tiwari<sup>a</sup> and S. K. Nandi<sup>b</sup>

<sup>a</sup> Department of Materials science and Engineering

National Chiao Tung University

1001 Ta Hsueh Road

Hsinchu, Taiwan, 300, R.O.C.

<sup>b</sup> Department of Physics

Rishi Bankim Chandra College

Naihati, 743165, West Bengal, India

\* Corresponding author

Jitendra N. Tiwari, Prof. Fu-Ming Pan

Department of Materials Science and Engineering

National Chiao Tung University

1001 Ta Hsueh Road

Hsinchu, Taiwan

(R.O.C.)

\* Email: [jnt\\_tiw123@yahoo.co.in](mailto:jnt_tiw123@yahoo.co.in),

[fmpan@faculty.nctu.edu.tw](mailto:fmpan@faculty.nctu.edu.tw)

Tel: 886-3-5131322, Fax: 886-3-5724727

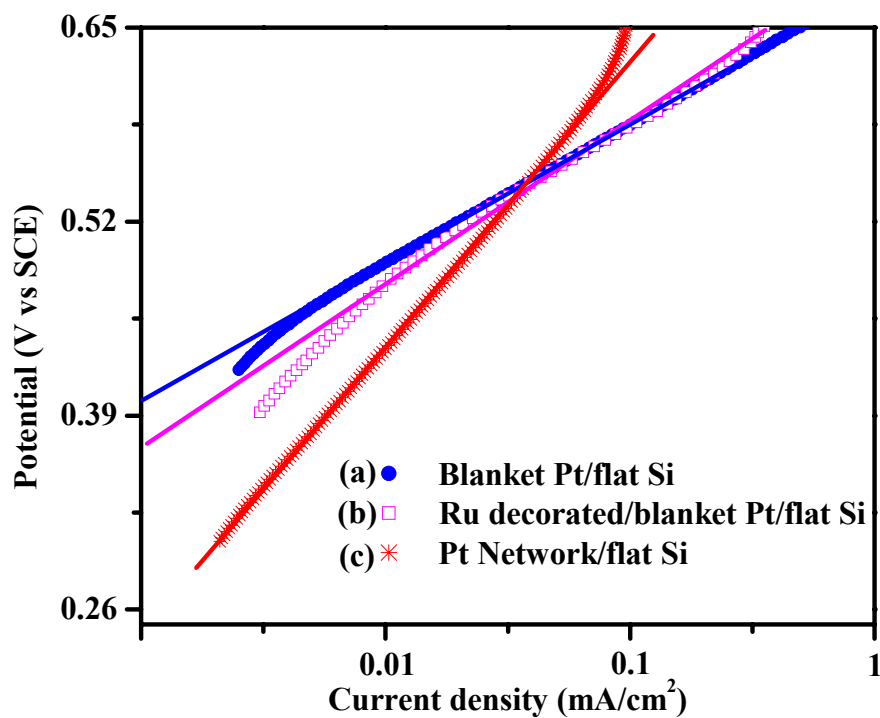

Figure (1S). Tafel plots for the electrochemical oxidation of 1 M CH<sub>3</sub>OH/1 M H<sub>2</sub>SO<sub>4</sub> aqueous solution at a scan rate of 1 mV/s.
